# Supplementary material for: miR-30e* is an independent subtype-specific prognostic marker in breast cancer
Source: PubMed Central journal article supplement — Br J Cancer. 2015 Jun 9;113(2):290–8. doi: 10.1038/bjc.2015.206 (PMC4506390; doi:10.1038/bjc.2015.206), 2015-06-09
Supplement: bjc2015206x2.pdf [file bjc2015206x2.pdf]

## Supplementary Figure 2

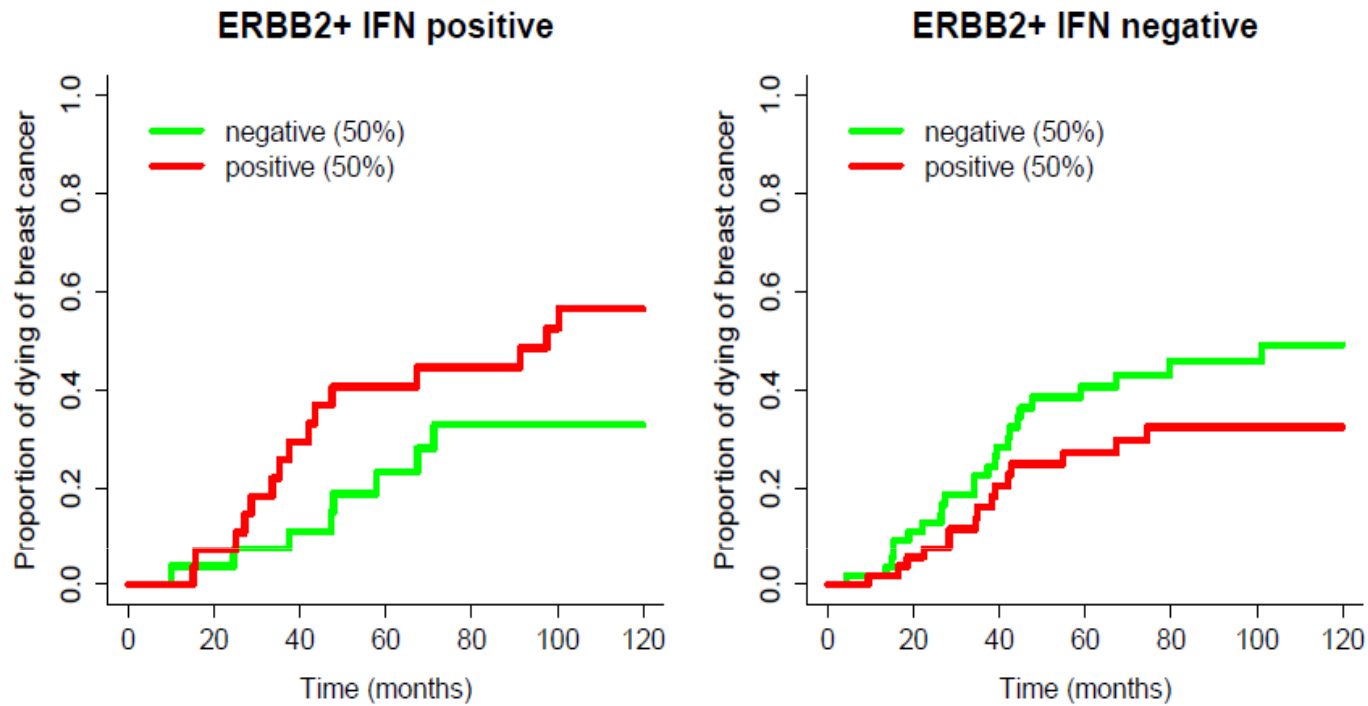

**Cumulative incidence curve at 10-years of follow-up for miR-30e\* expression pattern.** On the left, association with disease-specific survival in patients identified as IFN metagene positive (n=55). On the right, association with disease-specific survival in patients identified as IFN metagene negative (n =112).
