# Supplementary material for: miR-30e* is an independent subtype-specific prognostic marker in breast cancer
Source: PubMed Central journal article supplement — Br J Cancer. 2015 Jun 9;113(2):290–8. doi: 10.1038/bjc.2015.206 (PMC4506390; doi:10.1038/bjc.2015.206), 2015-06-09
Supplement: bjc2015206x5.pdf [file bjc2015206x5.pdf]

**Supplementary Table 2 - Sensitivity (SE) and specificity (SP) in predicting development of distant metastasis at best cut-off for differentially expressed miRNAs.**

| <b>miRNA</b>   | <b>Threshold</b> | <b>Percentile</b> | <b>SE</b> | <b>SP</b> |
|----------------|------------------|-------------------|-----------|-----------|
| hsa-miR-125b   | 13.916           | 50 <sup>th</sup>  | 0.62      | 0.60      |
| hsa-miR-1308   | 12.658           | 40 <sup>th</sup>  | 0.79      | 0.56      |
| hsa-miR-548-5p | 9.520            | 40 <sup>th</sup>  | 0.81      | 0.58      |
| hsa-miR-30e*   | 13.385           | 60 <sup>th</sup>  | 0.76      | 0.54      |
