# Supplementary material for: miR-30e* is an independent subtype-specific prognostic marker in breast cancer
Source: PubMed Central journal article supplement — Br J Cancer. 2015 Jun 9;113(2):290–8. doi: 10.1038/bjc.2015.206 (PMC4506390; doi:10.1038/bjc.2015.206), 2015-06-09
Supplement: bjc2015206x6.pdf [file bjc2015206x6.pdf]

**Supplementary Table 3 - Univariable Cox regression analysis in lymph node-negative untreated patients with *ESR1*+/*ERBB2*- tumors (total number = 223, unfavourable events = 33). The prognostic role of each miRNA was evaluated considering it as both continuous and dichotomous variable.**

| <b>Variables</b>                            | <b><math>\beta</math></b> | <b>HR (CI95%)</b>   | <b>P-value</b> |
|---------------------------------------------|---------------------------|---------------------|----------------|
| <b><u>miRNA as dichotomous variable</u></b> |                           |                     |                |
| hsa-miR-125b (+,-)                          | -0.454                    | 0.635 (0.318-1.267) | 0.198          |
| hsa-miR-1308 (+,-)                          | NA                        | NA                  | NA             |
| hsa-miR-548c-5p (+,-)                       | 0.114                     | 1.120 (0.551-2.277) | 0.754          |
| hsa-miR-30e* (+,-)                          | -1.880                    | 0.153 (0.047-0.500) | 0.0019         |
| <b><u>miRNA as continuous variable</u></b>  |                           |                     |                |
| hsa-miR-125b                                | -0.141                    | 0.868 (0.606-1.245) | 0.443          |
| hsa-miR-1308                                | NA                        | NA                  | NA             |
| hsa-miR-548c-5p                             | 0.430                     | 1.537 (0.241-9.790) | 0.649          |
| hsa-miR-30e*                                | -0.767                    | 0.464 (0.281-0.768) | 0.0028         |
