# Supplementary material for: miR-30e* is an independent subtype-specific prognostic marker in breast cancer
Source: PubMed Central journal article supplement — Br J Cancer. 2015 Jun 9;113(2):290–8. doi: 10.1038/bjc.2015.206 (PMC4506390; doi:10.1038/bjc.2015.206), 2015-06-09
Supplement: bjc2015206x7.pdf [file bjc2015206x7.pdf]

**Supplementary Table 4. Results of likelihood ratio test for the first order interactions between miR-30e\* and the variables taken into account in lymph node-negative untreated patients with *ESR1*+/*ERBB2*- tumors (total number = 207, unfavorable events = 31, missing values = 16).**

| <b>First order interactions</b> | <b>P-value</b> |
|---------------------------------|----------------|
| hsa-miR-30e* : Age              | 0.288          |
| hsa-miR-30e* : Size             | 0.0982         |
| hsa-miR-30e* : Grade            | 0.323          |
| hsa-miR-30e* : Tcell            | 0.660          |
| hsa-miR-30e* : IFN              | 0.295          |
| hsa-miR-30e* : GGI              | 0.123          |
