# Supplementary material for: miR-30e* is an independent subtype-specific prognostic marker in breast cancer
Source: PubMed Central journal article supplement — Br J Cancer. 2015 Jun 9;113(2):290–8. doi: 10.1038/bjc.2015.206 (PMC4506390; doi:10.1038/bjc.2015.206), 2015-06-09
Supplement: bjc2015206x8.pdf [file bjc2015206x8.pdf]

**Supplementary Table 5 - Multivariable Cox regression analysis in lymph node-negative untreated patients with *ESR1*+/*ERBB2*- tumors (total number = 207, unfavourable events = 31, missing values = 16). miR-30e\* was used as continuous variable.**

| <b>Variables</b>              | <b><math>\beta</math></b> | <b>HR (CI95%)</b>   | <b>P-value</b> |
|-------------------------------|---------------------------|---------------------|----------------|
| hsa-miR-30e*                  | -0.485                    | 0.616 (0.349-1.087) | 0.0946         |
| Age (> 50 yrs, $\leq$ 50 yrs) | -0.368                    | 0.692 (0.308-1.558) | 0.374          |
| Size (> 2 cm, $\leq$ 2 cm)    | 0.680                     | 1.973 (0.949-4.102) | 0.0688         |
| Grade (3, 1-2)                | 0.179                     | 1.196 (0.549-2.604) | 0.652          |
| T-cell metagene (+,-)         | -0.817                    | 0.442 (0.191-1.020) | 0.0556         |
| IFN metagene (+,-)            | -0.291                    | 0.748 (0.332-1.682) | 0.482          |
| GGI (> 0, $\leq$ 0)           | 1.485                     | 4.413 (1.895-10.28) | 0.000579       |
