# Supplementary material for: miR-30e* is an independent subtype-specific prognostic marker in breast cancer
Source: PubMed Central journal article supplement — Br J Cancer. 2015 Jun 9;113(2):290–8. doi: 10.1038/bjc.2015.206 (PMC4506390; doi:10.1038/bjc.2015.206), 2015-06-09
Supplement: bjc2015206x10.pdf [file bjc2015206x10.pdf]

**Supplementary Table 7. Results of likelihood ratio test for the first order interactions between miR-30e\* and the variables taken into account and for the main effects of these variables in patients with *ERBB2*+ tumors (total number = 160, unfavourable events = 56, missing values =7).**

| <b>Variables</b>                               | <b>P-value</b>                  |
|------------------------------------------------|---------------------------------|
| <b><u>First order interactions</u></b>         |                                 |
| hsa-miR-30e* : Age                             | 0.249                           |
| hsa-miR-30e* : Size                            | 0.402                           |
| hsa-miR-30e* : Grade                           | 0.745                           |
| hsa-miR-30e* : Treatment                       | 0.543                           |
| hsa-miR-30e* : N                               | 0.893                           |
| hsa-miR-30e* : Tcell                           | 0.181                           |
| hsa-miR-30e* : IFN                             | 0.0176                          |
| <b><u>Principal effects of final model</u></b> |                                 |
| hsa-miR-30e*                                   | tied to significant interaction |
| Age                                            | 0.437                           |
| Size                                           | 0.099                           |
| Grade                                          | 0.773                           |
| Treatment                                      | 0.830                           |
| Lymph node                                     | 0.00617                         |
| T-cell metagene                                | 0.211                           |
| IFN metagene                                   | tied to significant interaction |
