# Supplementary figures and images for: miR-30e* is an independent subtype-specific prognostic marker in breast cancer
Source: PubMed Central journal article supplement — Br J Cancer. 2015 Jun 9;113(2):290–8. doi: 10.1038/bjc.2015.206 (PMC4506390; doi:10.1038/bjc.2015.206), 2015-06-09

**A**

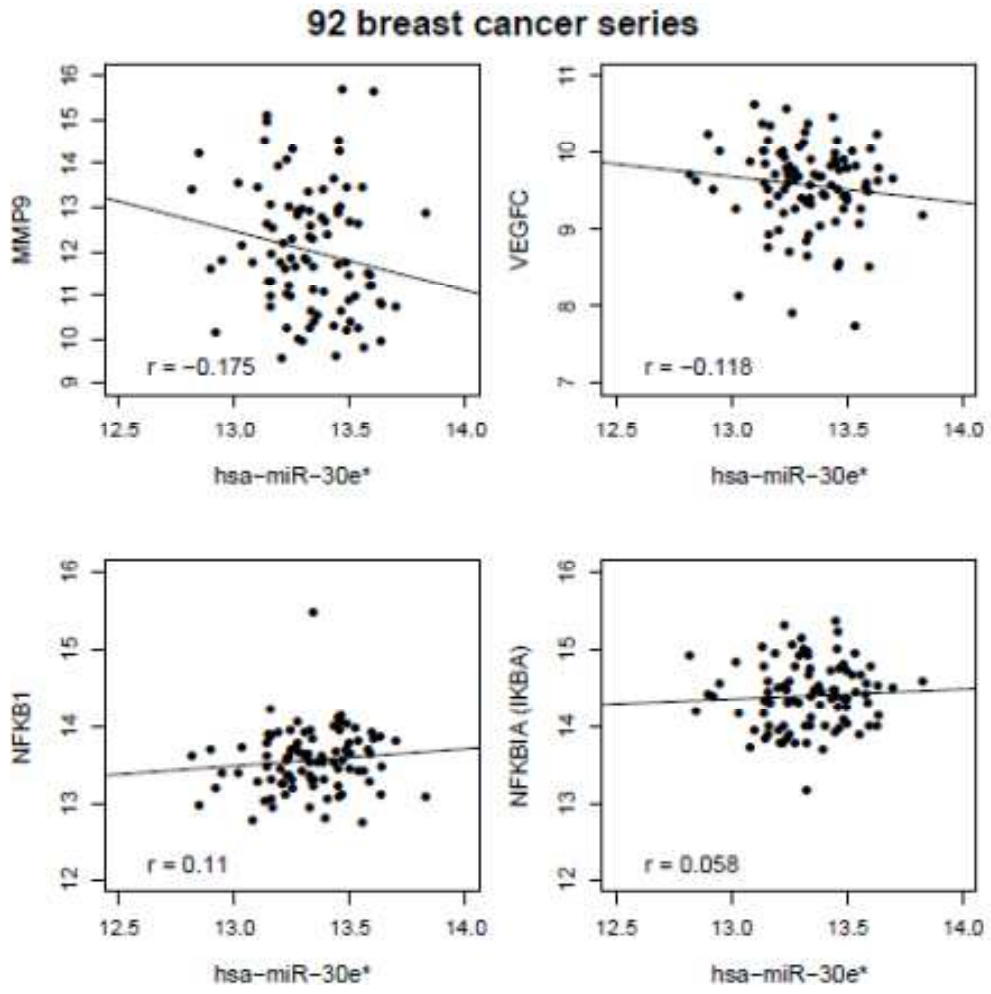

**B**

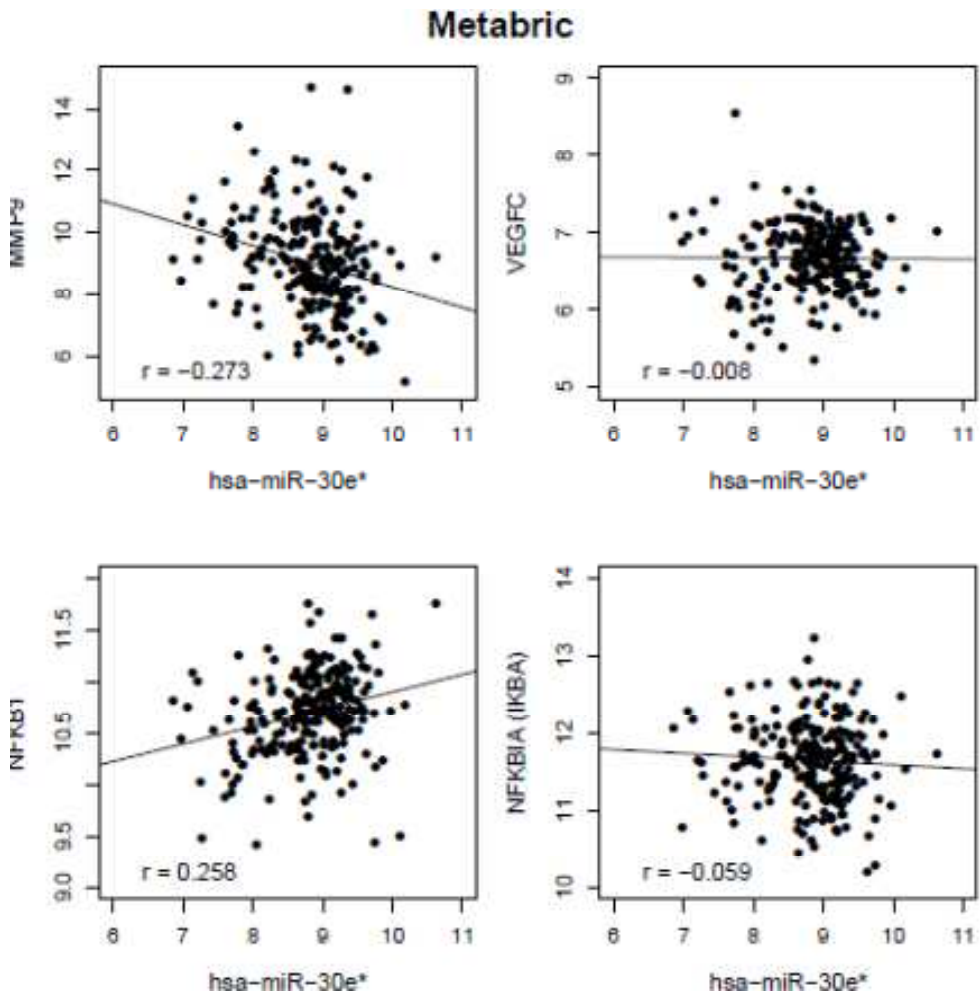

Supplement: bjc2015206x3.pdf [file bjc2015206x3.pdf]
